# Supplementary material
Source: Springer Nature journal article supplement (https://www.springermedizin.de/resource/supplementary/12887_2014_1094_MOESM5_ESM.pdf/9476436)

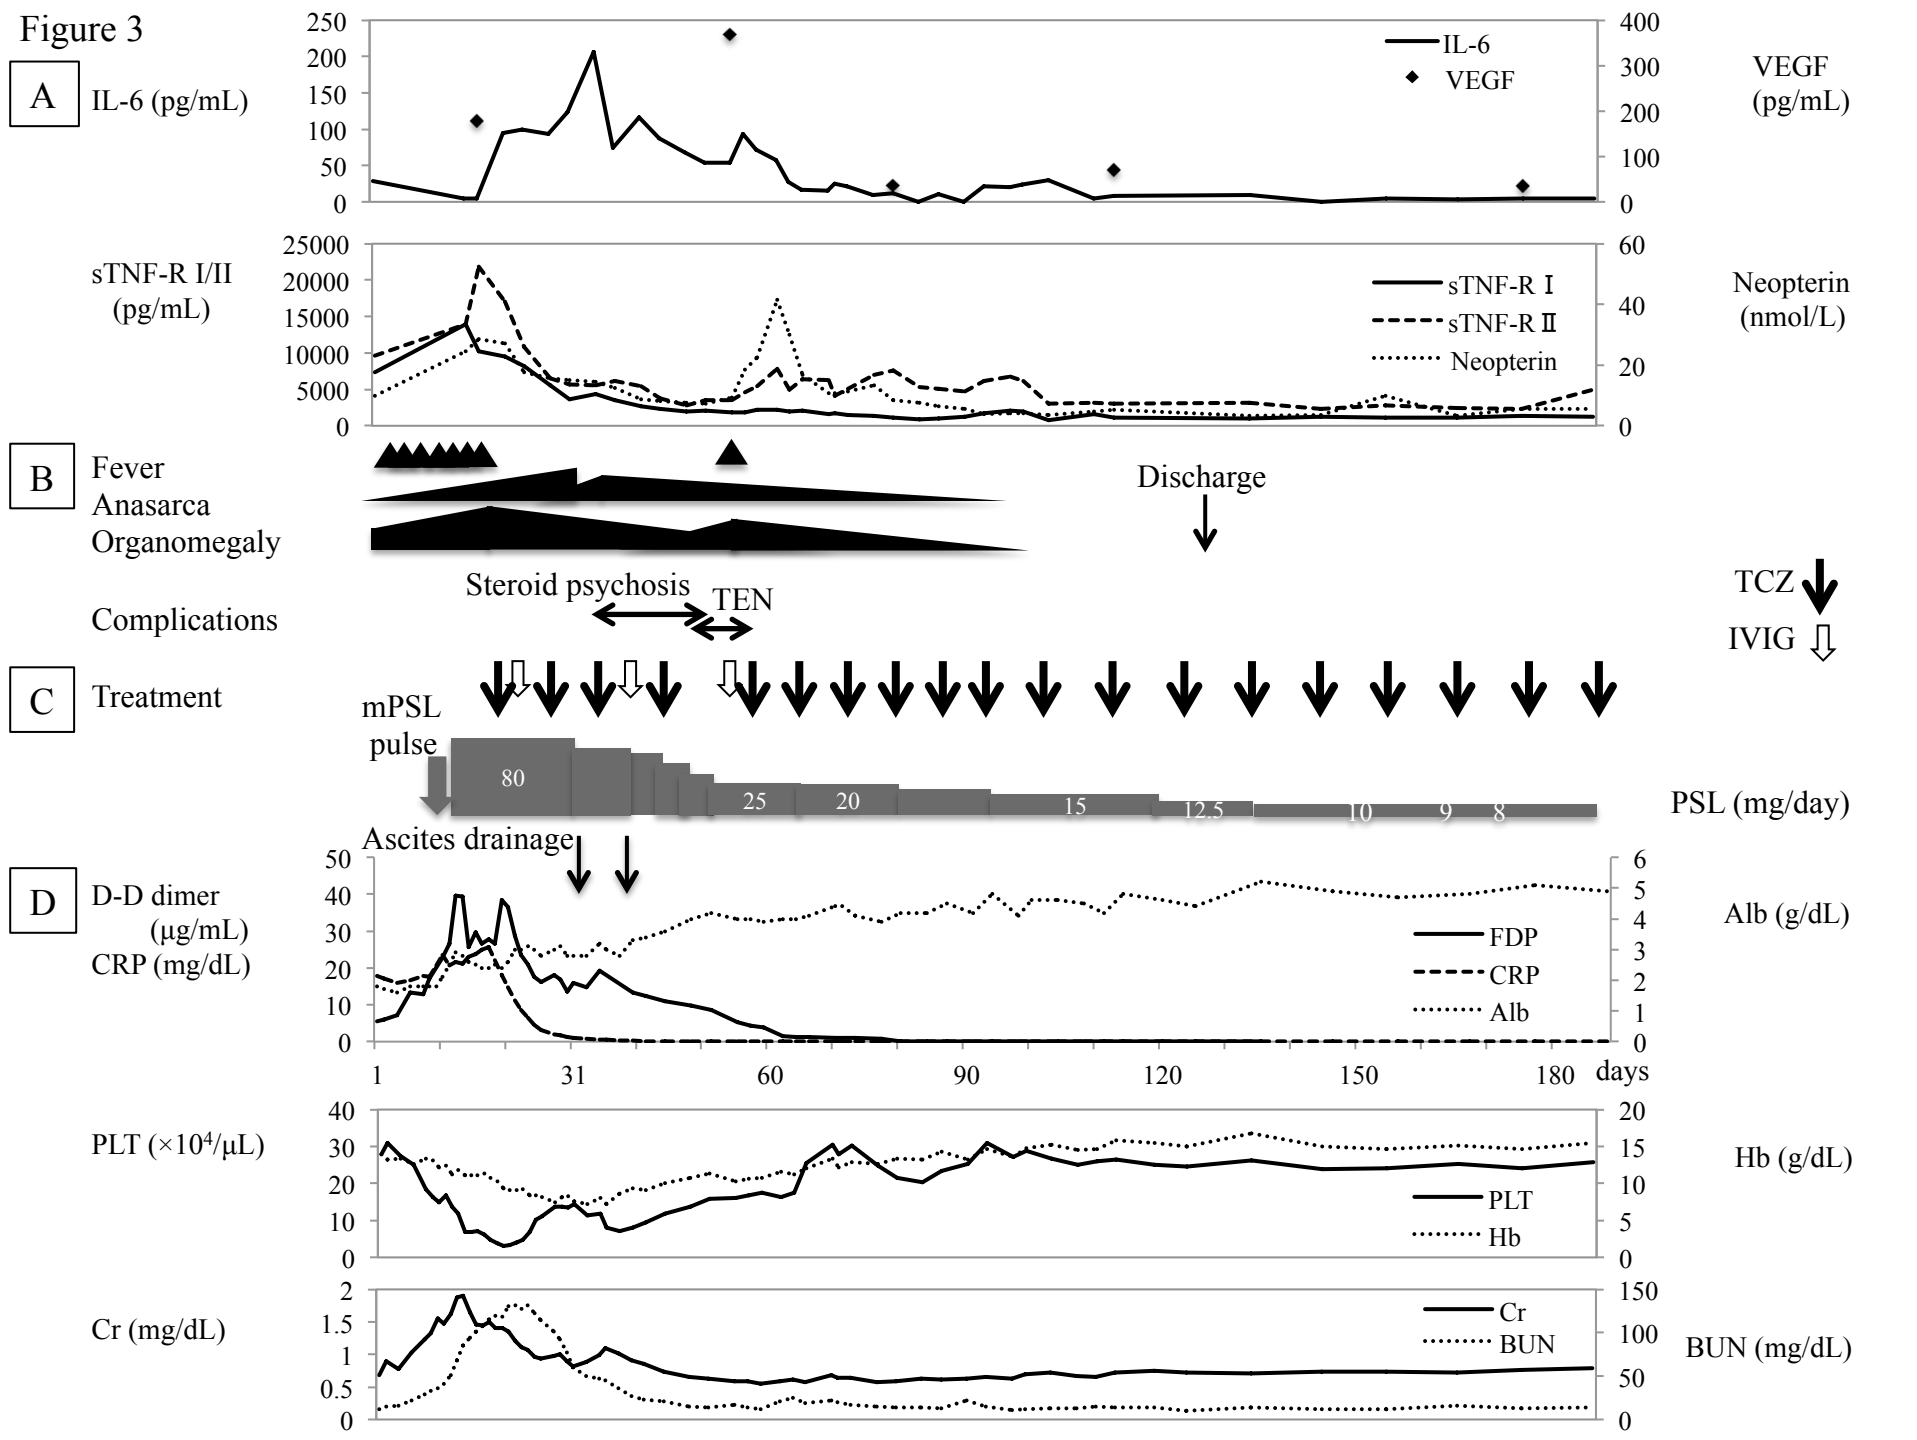

Supplement: MOESM5 [file 9476436]
